# Supplementary material for: A histone modification-based synthetic circuit to engineer temporal gene expression in Arabidopsis floral meristems
Source: Research Square preprint supplement (doi:10.21203/rs.3.rs-1240596/v1), 2022-01-19
Supplement: Supplementary file 2 [file 9f6d08ec5cc56990191ad0f1.xlsx]

## Sheet: Sheet1
Supplementary Data 1 Genome-wide identification of biotimer-regulated genes
ag DEG st3-4 (a)	ag DEG st5-6 (b)	CLForEMF2orFIE and K27me3 (d)	AG ChIP qval4
AT1G02110	AT1G01570	AT1G01030	AT1G01060
AT1G04150	AT1G01990	AT1G01030	AT1G01115
AT1G05730	AT1G02110	AT1G01190	AT1G01183
AT1G06160	AT1G02520	AT1G01250	AT1G01210
AT1G07270	AT1G02530	AT1G01420	AT1G01360
AT1G08320	AT1G02690	AT1G01453	AT1G01530
AT1G08860	AT1G02970	AT1G01453	AT1G01540
AT1G10950	AT1G03060	AT1G01453	AT1G01580
AT1G13690	AT1G03710	AT1G02065	AT1G01880
AT1G18870	AT1G03720	AT1G02065	AT1G01900
AT1G19490	AT1G04050	AT1G02065	AT1G02590
AT1G19940	AT1G04150	AT1G02190	AT1G02650
AT1G20050	AT1G04160	AT1G02335	AT1G02890
AT1G21460	AT1G04520	AT1G02335	AT1G02960
AT1G22630	AT1G04730	AT1G02340	AT1G03180
AT1G24650	AT1G04870	AT1G02340	AT1G03210
AT1G29630	AT1G04900	AT1G02340	AT1G03300
AT1G47480	AT1G05055	AT1G02390	AT1G03310
AT1G48870	AT1G05470	AT1G02390	AT1G03440
AT1G49475	AT1G05490	AT1G02390	AT1G03870
AT1G50290	AT1G05730	AT1G02390	AT1G03880
AT1G52030	AT1G05830	AT1G02390	AT1G04150
AT1G54330	AT1G05950	AT1G02390	AT1G04160
AT1G62150	AT1G06310	AT1G02390	AT1G04240
AT1G66140	AT1G06560	AT1G02390	AT1G04270
AT1G67260	AT1G06660	AT1G02580	AT1G04370
AT1G68640	AT1G07270	AT1G02620	AT1G04425
AT1G68810	AT1G07520	AT1G02620	AT1G04501
AT1G68870	AT1G07980	AT1G02610	AT1G04530
AT1G69180	AT1G08320	AT1G02810	AT1G04540
AT1G69600	AT1G08380	AT1G02810	AT1G04530
AT1G71400	AT1G08650	AT1G02810	AT1G04540
AT1G72560	AT1G08840	AT1G02813	AT1G04750
AT1G75430	AT1G08860	AT1G03710	AT1G04760
AT1G76110	AT1G09450	AT1G03710	AT1G04790
AT2G14800	AT1G10220	AT1G03710	AT1G04780
AT2G20723	AT1G10520	AT1G03720	AT1G04790
AT2G22140	AT1G10682	AT1G03720	AT1G04820
AT2G22540	AT1G10780	AT1G03720	AT1G04930
AT2G22800	AT1G10900	AT1G03720	AT1G05100
AT2G24190	AT1G10980	AT1G03780	AT1G05120
AT2G26690	AT1G11125	AT1G03780	AT1G05370
AT2G27060	AT1G11290	AT1G03790	AT1G05460
AT2G27880	AT1G11530	AT1G03790	AT1G05710
AT2G33590	AT1G12080	AT1G03800	AT1G05710
AT2G33880	AT1G12380	AT1G03800	AT1G05730
AT2G34920	AT1G12470	AT1G03840	AT1G05850
AT2G34925	AT1G12805	AT1G03840	AT1G05860
AT2G35310	AT1G13290	AT1G03840	AT1G05900
AT2G35700	AT1G13400	AT1G03840	AT1G05950
AT2G40330	AT1G14040	AT1G03840	AT1G06002
AT2G41070	AT1G14150	AT1G03840	AT1G06100
AT2G41820	AT1G14600	AT1G03840	AT1G06170
AT2G42280	AT1G14760	AT1G04150	AT1G06180
AT2G43990	AT1G14970	AT1G04150	AT1G07090
AT2G46310	AT1G15480	AT1G04150	AT1G07100
AT2G46455	AT1G15550	AT1G04150	AT1G07150
AT2G46950	AT1G15750	AT1G04445	AT1G07160
AT2G47260	AT1G15800	AT1G04445	AT1G07170
AT3G04960	AT1G15980	AT1G04445	AT1G07210
AT3G05660	AT1G16220	AT1G04450	AT1G07340
AT3G05800	AT1G16500	AT1G04660	AT1G07580
AT3G13277	AT1G16800	AT1G04660	AT1G07670
AT3G14370	AT1G16810	AT1G05080	AT1G07680
AT3G14440	AT1G17230	AT1G05230	AT1G07728
AT3G14580	AT1G18710	AT1G05230	AT1G08100
AT3G15357	AT1G18850	AT1G05230	AT1G08210
AT3G17010	AT1G18870	AT1G05291	AT1G08260
AT3G17340	AT1G19330	AT1G05310	AT1G08270
AT3G18310	AT1G19490	AT1G05420	AT1G08280
AT3G20880	AT1G19790	AT1G05800	AT1G08315
AT3G20960	AT1G20060	AT1G06280	AT1G08420
AT3G21100	AT1G20190	AT1G06360	AT1G08630
AT3G23050	AT1G20230	AT1G06810	AT1G08695
AT3G23130	AT1G20530	AT1G06810	AT1G08710
AT3G24760	AT1G20570	AT1G06980	AT1G09470
AT3G25030	AT1G20720	AT1G06980	AT1G09480
AT3G25560	AT1G21000	AT1G07430	AT1G09470
AT3G28715	AT1G21065	AT1G07430	AT1G09570
AT3G29410	AT1G21460	AT1G07430	AT1G09570
AT3G46040	AT1G21940	AT1G07430	AT1G09570
AT3G46130	AT1G22490	AT1G07430	AT1G09600
AT3G49370	AT1G22630	AT1G07640	AT1G09780
AT3G54340	AT1G22850	AT1G07640	AT1G09810
AT3G55500	AT1G23110	AT1G07640	AT1G09840
AT3G57380	AT1G23170	AT1G07645	AT1G09850
AT3G63440	AT1G23380	AT1G08290	AT1G09950
AT4G02070	AT1G24290	AT1G08320	AT1G09960
AT4G08950	AT1G24650	AT1G08320	AT1G10020
AT4G13640	AT1G25370	AT1G08860	AT1G10030
AT4G13670	AT1G26310	AT1G08990	AT1G10070
AT4G13690	AT1G26540	AT1G08990	AT1G10120
AT4G13800	AT1G26900	AT1G08990	AT1G10200
AT4G13820	AT1G27030	AT1G09350	AT1G10210
AT4G13830	AT1G27590	AT1G09483	AT1G10230
AT4G13930	AT1G28685	AT1G09550	AT1G10370
AT4G13950	AT1G29070	AT1G10220	AT1G10380
AT4G13990	AT1G29395	AT1G10270	AT1G10460
AT4G14010	AT1G29630	AT1G10270	AT1G10640
AT4G14040	AT1G30380	AT1G10480	AT1G10740
AT4G14103	AT1G30475	AT1G10585	AT1G10745
AT4G14190	AT1G30840	AT1G11230	AT1G10840
AT4G14240	AT1G30950	AT1G11230	AT1G10850
AT4G14305	AT1G31010	AT1G11230	AT1G11112
AT4G14320	AT1G31290	AT1G11470	AT1G11120
AT4G14360	AT1G31320	AT1G11470	AT1G11240
AT4G14385	AT1G31660	AT1G11580	AT1G11250
AT4G14440	AT1G31750	AT1G11600	AT1G11290
AT4G14590	AT1G33500	AT1G12030	AT1G11700
AT4G14600	AT1G33930	AT1G12030	AT1G11940
AT4G14605	AT1G34060	AT1G12030	AT1G12120
AT4G14640	AT1G35220	AT1G12030	AT1G12130
AT4G14660	AT1G35530	AT1G12064	AT1G12210
AT4G14695	AT1G35730	AT1G12110	AT1G12423
AT4G14716	AT1G42970	AT1G12200	AT1G12430
AT4G15000	AT1G47230	AT1G12260	AT1G12500
AT4G15010	AT1G47270	AT1G12570	AT1G12780
AT4G15090	AT1G47480	AT1G12805	AT1G13245
AT4G15093	AT1G47990	AT1G12960	AT1G13260
AT4G15210	AT1G48870	AT1G12980	AT1G13410
AT4G15260	AT1G49475	AT1G13290	AT1G13607
AT4G15390	AT1G49540	AT1G13290	AT1G13700
AT4G15420	AT1G49720	AT1G13290	AT1G13710
AT4G15430	AT1G49910	AT1G13300	AT1G13710
AT4G15440	AT1G50700	AT1G13400	AT1G13720
AT4G15475	AT1G50770	AT1G13710	AT1G13760
AT4G15490	AT1G50790	AT1G13710	AT1G13770
AT4G15820	AT1G52700	AT1G13710	AT1G14440
AT4G15880	AT1G52770	AT1G13850	AT1G14440
AT4G15910	AT1G53160	AT1G14110	AT1G14580
AT4G15975	AT1G53700	AT1G14110	AT1G14600
AT4G16060	AT1G54160	AT1G14540	AT1G14720
AT4G16120	AT1G54220	AT1G14580	AT1G14760
AT4G16190	AT1G54560	AT1G14580	AT1G14760
AT4G16250	AT1G54780	AT1G14580	AT1G14900
AT4G16520	AT1G55050	AT1G14580	AT1G15100
AT4G16550	AT1G55500	AT1G14580	AT1G15110
AT4G16563	AT1G55600	AT1G14549	AT1G15110
AT4G16590	AT1G55850	AT1G14549	AT1G15120
AT4G16600	AT1G55890	AT1G14549	AT1G15125
AT4G16680	AT1G56040	AT1G14600	AT1G15420
AT4G16750	AT1G58460	AT1G14930	AT1G15430
AT4G16765	AT1G59760	AT1G14930	AT1G15690
AT4G16780	AT1G60630	AT1G14930	AT1G15690
AT4G16800	AT1G60950	AT1G14940	AT1G15800
AT4G16807	AT1G61360	AT1G14950	AT1G15810
AT4G16830	AT1G61450	AT1G14950	AT1G15850
AT4G16835	AT1G62150	AT1G14960	AT1G15860
AT4G16845	AT1G62360	AT1G15350	AT1G16070
AT4G16892	AT1G62510	AT1G15360	AT1G16080
AT4G16900	AT1G63100	AT1G15360	AT1G16705
AT4G16920	AT1G63480	AT1G15680	AT1G16840
AT4G16950	AT1G64110	AT1G16390	AT1G16870
AT4G16970	AT1G64300	AT1G16390	AT1G16880
AT4G16980	AT1G64510	AT1G16390	AT1G17110
AT4G16990	AT1G64625	AT1G16400	AT1G17120
AT4G17050	AT1G65710	AT1G16400	AT1G17400
AT4G17486	AT1G66140	AT1G16410	AT1G17420
AT4G17520	AT1G67770	AT1G16410	AT1G17940
AT4G17530	AT1G67780	AT1G16940	AT1G18070
AT4G17600	AT1G68185	AT1G17310	AT1G18075
AT4G17610	AT1G68460	AT1G17950	AT1G18070
AT4G17695	AT1G68480	AT1G18140	AT1G18075
AT4G17800	AT1G68520	AT1G18140	AT1G18100
AT4G17830	AT1G68640	AT1G18570	AT1G18120
AT4G17880	AT1G68870	AT1G18570	AT1G18200
AT4G17940	AT1G69180	AT1G18580	AT1G18250
AT4G18030	AT1G69485	AT1G18770	AT1G18400
AT4G18197	AT1G69600	AT1G18835	AT1G18415
AT4G18220	AT1G69710	AT1G19620	AT1G18440
AT4G18260	AT1G70760	AT1G19620	AT1G18450
AT4G18300	AT1G71060	AT1G19620	AT1G18480
AT4G18350	AT1G71230	AT1G19790	AT1G18600
AT4G18375	AT1G71770	AT1G19790	AT1G18720
AT4G18440	AT1G71830	AT1G19790	AT1G18730
AT4G18465	AT1G71850	AT1G19800	AT1G18720
AT4G18580	AT1G72070	AT1G19900	AT1G18730
AT4G18590	AT1G72100	AT1G19900	AT1G18890
AT4G18630	AT1G72210	AT1G20070	AT1G18900
AT4G18700	AT1G72730	AT1G20130	AT1G19050
AT4G18710	AT1G72830	AT1G20650	AT1G19110
AT4G18890	AT1G73080	AT1G20650	AT1G19160
AT4G18960	AT1G73210	AT1G20650	AT1G19170
AT4G18975	AT1G73590	AT1G20650	AT1G19340
AT4G19003	AT1G73620	AT1G20650	AT1G19450
AT4G19020	AT1G74130	AT1G20800	AT1G19460
AT4G19030	AT1G74330	AT1G20800	AT1G19780
AT4G19040	AT1G74410	AT1G20800	AT1G19780
AT4G19045	AT1G74430	AT1G20900	AT1G19800
AT4G19080	AT1G74880	AT1G20900	AT1G19835
AT4G19185	AT1G75350	AT1G20900	AT1G19850
AT4G19400	AT1G75430	AT1G21000	AT1G19870
AT4G19430	AT1G75690	AT1G20990	AT1G19920
AT4G19490	AT1G75750	AT1G20990	AT1G19930
AT4G19540	AT1G75820	AT1G20990	AT1G19940
AT4G19560	AT1G76110	AT1G20990	AT1G20375
AT4G19630	AT1G76500	AT1G21140	AT1G20620
AT4G19650	AT1G76590	AT1G21280	AT1G20650
AT4G19660	AT1G77550	AT1G21280	AT1G20840
AT4G20480	AT1G77765	AT1G21310	AT1G20870
AT4G21590	AT1G78120	AT1G21990	AT1G20890
AT4G23670	AT1G79350	AT1G22110	AT1G21060
AT4G24540	AT1G79470	AT1G22220	AT1G21080
AT4G25420	AT1G79530	AT1G22490	AT1G21090
AT4G30190	AT1G79890	AT1G22490	AT1G21327
AT4G30270	AT2G01490	AT1G22490	AT1G21330
AT4G30940	AT2G01500	AT1G22490	AT1G21380
AT4G31400	AT2G01505	AT1G22600	AT1G21460
AT4G35070	AT2G01510	AT1G22990	AT1G21460
AT4G36030	AT2G01630	AT1G23380	AT1G21520
AT4G37400	AT2G02795	AT1G23380	AT1G21540
AT4G37740	AT2G02820	AT1G23420	AT1G21670
AT4G37925	AT2G03020	AT1G23420	AT1G21670
AT5G01520	AT2G03505	AT1G23770	AT1G21740
AT5G04610	AT2G05380	AT1G23770	AT1G21738
AT5G05870	AT2G07677	AT1G23770	AT1G21740
AT5G06120	AT2G11810	AT1G24256	AT1G21830
AT5G09445	AT2G14800	AT1G24260	AT1G21835
AT5G14000	AT2G15960	AT1G24260	AT1G21920
AT5G16190	AT2G15970	AT1G24260	AT1G21945
AT5G16850	AT2G16090	AT1G24260	AT1G22050
AT5G16860	AT2G16210	AT1G24260	AT1G22070
AT5G17020	AT2G16485	AT1G24265	AT1G22180
AT5G17810	AT2G16760	AT1G24520	AT1G22240
AT5G18560	AT2G16880	AT1G24577	AT1G22460
AT5G19160	AT2G17510	AT1G24590	AT1G22600
AT5G19550	AT2G17900	AT1G24590	AT1G22810
AT5G19890	AT2G18000	AT1G24600	AT1G22830
AT5G23260	AT2G18330	AT1G25250	AT1G23110
AT5G23750	AT2G19090	AT1G25250	AT1G23120
AT5G24420	AT2G19110	AT1G25250	AT1G23170
AT5G35670	AT2G20300	AT1G25250	AT1G23360
AT5G37790	AT2G20723	AT1G25250	AT1G23390
AT5G42760	AT2G21150	AT1G25410	AT1G23670
AT5G43870	AT2G21530	AT1G25410	AT1G24265
AT5G48490	AT2G21870	AT1G25560	AT1G24590
AT5G51500	AT2G22140	AT1G26515	AT1G24600
AT5G51670	AT2G22420	AT1G26515	AT1G24625
AT5G51800	AT2G22540	AT1G26515	AT1G24640
AT5G54380	AT2G22600	AT1G26600	AT1G24625
AT5G57720	AT2G22610	AT1G26780	AT1G24640
AT5G59390	AT2G22800	AT1G26780	AT1G25220
AT5G60890	AT2G22840	AT1G26780	AT1G25330
AT5G61090	AT2G22900	AT1G26780	AT1G25330
AT5G62230	AT2G22950	AT1G26780	AT1G25340
	AT2G23530	AT1G27040	AT1G25375
	AT2G23610	AT1G27040	AT1G25380
	AT2G24190	AT1G27040	AT1G25540
	AT2G24310	AT1G27550	AT1G25550
	AT2G25640	AT1G27620	AT1G25560
	AT2G26690	AT1G27620	AT1G25570
	AT2G26760	AT1G27620	AT1G26190
	AT2G27040	AT1G27660	AT1G26320
	AT2G27060	AT1G27660	AT1G26310
	AT2G27250	AT1G27670	AT1G26320
	AT2G27330	AT1G27860	AT1G26355
	AT2G27610	AT1G27870	AT1G26770
	AT2G27880	AT1G28300	AT1G26771
	AT2G27990	AT1G28300	AT1G26773
	AT2G28500	AT1G28300	AT1G26780
	AT2G28540	AT1G28300	AT1G26780
	AT2G29730	AT1G28360	AT1G26790
	AT2G30420	AT1G28360	AT1G26795
	AT2G31870	AT1G28500	AT1G26970
	AT2G31980	AT1G28500	AT1G27210
	AT2G32150	AT1G28500	AT1G27260
	AT2G32590	AT1G29280	AT1G27350
	AT2G32930	AT1G29280	AT1G27360
	AT2G32940	AT1G30100	AT1G27540
	AT2G33205	AT1G30100	AT1G27540
	AT2G33260	AT1G30160	AT1G27550
	AT2G33530	AT1G30290	AT1G27550
	AT2G33640	AT1G30330	AT1G27550
	AT2G34650	AT1G30330	AT1G27560
	AT2G34920	AT1G30330	AT1G27565
	AT2G34925	AT1G30350	AT1G27560
	AT2G35030	AT1G30350	AT1G27565
	AT2G35160	AT1G30650	AT1G27560
	AT2G35310	AT1G30650	AT1G27565
	AT2G35370	AT1G30650	AT1G27560
	AT2G35530	AT1G30650	AT1G27565
	AT2G35640	AT1G30700	AT1G27570
	AT2G35700	AT1G30710	AT1G27580
	AT2G35736	AT1G30710	AT1G27590
	AT2G36610	AT1G30720	AT1G27580
	AT2G36630	AT1G30720	AT1G27590
	AT2G37690	AT1G30730	AT1G27671
	AT2G38530	AT1G30840	AT1G27840
	AT2G39300	AT1G30920	AT1G27850
	AT2G39470	AT1G30950	AT1G28010
	AT2G41070	AT1G31360	AT1G28050
	AT2G41130	AT1G31630	AT1G28060
	AT2G41440	AT1G31670	AT1G28080
	AT2G41820	AT1G32050	AT1G28110
	AT2G42280	AT1G32050	AT1G28180
	AT2G42830	AT1G32050	AT1G28190
	AT2G43820	AT1G32140	AT1G28320
	AT2G43990	AT1G32240	AT1G28360
	AT2G44170	AT1G32240	AT1G28360
	AT2G44460	AT1G33600	AT1G28370
	AT2G44580	AT1G33750	AT1G28630
	AT2G44870	AT1G33760	AT1G29240
	AT2G46040	AT1G33760	AT1G29270
	AT2G46140	AT1G33770	AT1G29270
	AT2G46310	AT1G34460	AT1G29900
	AT2G46455	AT1G34460	AT1G30210
	AT2G46680	AT1G34640	AT1G30320
	AT2G46890	AT1G35140	AT1G30400
	AT2G46950	AT1G35140	AT1G30490
	AT2G47300	AT1G35780	AT1G30825
	AT2G47450	AT1G35780	AT1G30845
	AT2G47520	AT1G35780	AT1G30935
	AT3G01330	AT1G35830	AT1G31030
	AT3G01610	AT1G35830	AT1G31170
	AT3G02010	AT1G35830	AT1G31290
	AT3G02040	AT1G40129	AT1G31319
	AT3G02330	AT1G44180	AT1G31358
	AT3G02710	AT1G44180	AT1G31360
	AT3G02870	AT1G44180	AT1G31500
	AT3G02980	AT1G46264	AT1G31510
	AT3G03050	AT1G46264	AT1G31750
	AT3G03100	AT1G47395	AT1G31760
	AT3G04800	AT1G47400	AT1G31920
	AT3G04960	AT1G47870	AT1G31930
	AT3G05160	AT1G48990	AT1G32090
	AT3G05340	AT1G49190	AT1G32120
	AT3G05690	AT1G49190	AT1G32110
	AT3G06030	AT1G49330	AT1G32130
	AT3G06120	AT1G49450	AT1G32240
	AT3G06600	AT1G49470	AT1G32460
	AT3G07060	AT1G53830	AT1G32660
	AT3G07290	AT1G54000	AT1G33240
	AT3G07580	AT1G54010	AT1G33270
	AT3G08570	AT1G54200	AT1G33370
	AT3G08660	AT1G55420	AT1G33785
	AT3G08800	AT1G55420	AT1G33890
	AT3G09390	AT1G55420	AT1G34200
	AT3G09430	AT1G55440	AT1G34200
	AT3G10040	AT1G55440	AT1G34200
	AT3G10050	AT1G55440	AT1G34300
	AT3G10390	AT1G55580	AT1G34570
	AT3G10480	AT1G55580	AT1G34640
	AT3G10590	AT1G55580	AT1G34650
	AT3G10630	AT1G55580	AT1G35720
	AT3G10660	AT1G55591	AT1G35745
	AT3G11150	AT1G61540	AT1G35750
	AT3G11260	AT1G61630	AT1G35770
	AT3G11520	AT1G61660	AT1G35770
	AT3G12040	AT1G61750	AT1G37140
	AT3G12060	AT1G62360	AT1G42510
	AT3G13277	AT1G62360	AT1G43145
	AT3G13380	AT1G62500	AT1G43150
	AT3G13740	AT1G62500	AT1G43620
	AT3G13782	AT1G64030	AT1G43765
	AT3G13860	AT1G64625	AT1G44750
	AT3G14020	AT1G64870	AT1G44790
	AT3G14370	AT1G66000	AT1G44900
	AT3G14580	AT1G66120	AT1G45160
	AT3G14920	AT1G66310	AT1G45163
	AT3G15130	AT1G66500	AT1G45249
	AT3G15170	AT1G67100	AT1G45616
	AT3G15280	AT1G67160	AT1G45688
	AT3G15380	AT1G68040	AT1G46264
	AT3G15720	AT1G68130	AT1G47490
	AT3G16250	AT1G68480	AT1G47497
	AT3G16300	AT1G68480	AT1G47500
	AT3G17010	AT1G68480	AT1G47730
	AT3G17340	AT1G68480	AT1G47750
	AT3G17830	AT1G68520	AT1G47810
	AT3G18430	AT1G68520	AT1G47980
	AT3G18524	AT1G68520	AT1G47990
	AT3G18560	AT1G69120	AT1G48040
	AT3G18600	AT1G69120	AT1G48050
	AT3G18680	AT1G69120	AT1G48330
	AT3G18960	AT1G69310	AT1G48360
	AT3G19184	AT1G69320	AT1G48730
	AT3G19500	AT1G70270	AT1G48810
	AT3G20300	AT1G70640	AT1G48870
	AT3G20500	AT1G70720	AT1G49230
	AT3G20880	AT1G70890	AT1G49460
	AT3G21080	AT1G70895	AT1G49490
	AT3G21100	AT1G72570	AT1G49600
	AT3G21330	AT1G75450	AT1G49715
	AT3G22104	AT1G75520	AT1G49720
	AT3G23050	AT1G75520	AT1G49780
	AT3G23130	AT1G75530	AT1G49790
	AT3G23830	AT1G75530	AT1G49810
	AT3G24000	AT1G76240	AT1G49820
	AT3G24090	AT1G76250	AT1G50020
	AT3G24340	AT1G76250	AT1G50390
	AT3G24515	AT1G76250	AT1G50400
	AT3G24590	AT1G76500	AT1G50420
	AT3G24810	AT1G78460	AT1G50750
	AT3G25560	AT1G78470	AT1G50940
	AT3G26400	AT1G78650	AT1G50950
	AT3G26410	AT1G78815	AT1G51360
	AT3G26539	AT1G79370	AT1G51950
	AT3G26740	AT1G79430	AT1G52325
	AT3G27160	AT1G79430	AT1G52560
	AT3G27190	AT1G79430	AT1G53030
	AT3G27220	AT1G79430	AT1G53035
	AT3G27330	AT1G79430	AT1G53039
	AT3G27540	AT2G01810	AT1G53090
	AT3G27860	AT2G01810	AT1G53160
	AT3G28560	AT2G01940	AT1G53200
	AT3G28580	AT2G01940	AT1G53210
	AT3G28660	AT2G02060	AT1G53233
	AT3G29280	AT2G02070	AT1G53340
	AT3G29350	AT2G02080	AT1G53345
	AT3G29410	AT2G02080	AT1G53380
	AT3G30180	AT2G02080	AT1G53390
	AT3G44890	AT2G02080	AT1G53850
	AT3G45000	AT2G02080	AT1G53860
	AT3G45600	AT2G02080	AT1G54080
	AT3G46770	AT2G02080	AT1G54260
	AT3G46790	AT2G02080	AT1G54500
	AT3G47295	AT2G02450	AT1G54570
	AT3G47350	AT2G02450	AT1G54575
	AT3G47460	AT2G02450	AT1G54680
	AT3G47560	AT2G02660	AT1G54660
	AT3G47820	AT2G02660	AT1G54710
	AT3G48160	AT2G02660	AT1G54720
	AT3G48200	AT2G02660	AT1G54730
	AT3G49080	AT2G02660	AT1G54790
	AT3G49370	AT2G02680	AT1G54820
	AT3G49740	AT2G03000	AT1G54860
	AT3G49810	AT2G03020	AT1G55120
	AT3G49830	AT2G03020	AT1G55200
	AT3G49832	AT2G03170	AT1G55205
	AT3G50230	AT2G03290	AT1G55510
	AT3G50330	AT2G03500	AT1G55580
	AT3G50440	AT2G03500	AT1G55690
	AT3G50850	AT2G04680	AT1G55805
	AT3G51060	AT2G05440	AT1G55810
	AT3G51890	AT2G15610	AT1G56200
	AT3G52150	AT2G18500	AT1G56555
	AT3G52290	AT2G18500	AT1G56560
	AT3G52670	AT2G18500	AT1G56580
	AT3G53310	AT2G21010	AT1G56600
	AT3G53420	AT2G21010	AT1G56640
	AT3G53530	AT2G22180	AT1G56660
	AT3G53680	AT2G22330	AT1G57565
	AT3G53840	AT2G23170	AT1G58030
	AT3G53940	AT2G23760	AT1G58080
	AT3G54060	AT2G24260	AT1G59960
	AT3G54490	AT2G24260	AT1G59970
	AT3G55060	AT2G24810	AT1G60160
	AT3G56570	AT2G25890	AT1G60170
	AT3G56910	AT2G25890	AT1G60940
	AT3G57060	AT2G28630	AT1G60940
	AT3G57130	AT2G28810	AT1G60950
	AT3G57380	AT2G28810	AT1G62045
	AT3G57600	AT2G31230	AT1G62360
	AT3G57780	AT2G32370	AT1G62360
	AT3G58780	AT2G35270	AT1G62360
	AT3G59200	AT2G35300	AT1G62870
	AT3G59270	AT2G35300	AT1G62870
	AT3G59530	AT2G35640	AT1G63020
	AT3G60400	AT2G35930	AT1G63480
	AT3G60670	AT2G36770	AT1G64350
	AT3G60870	AT2G38240	AT1G64355
	AT3G60900	AT2G39030	AT1G64360
	AT3G61410	AT2G41370	AT1G64670
	AT3G61460	AT2G42610	AT1G64680
	AT3G61890	AT2G42840	AT1G64970
	AT3G62410	AT2G43570	AT1G66900
	AT3G62430	AT2G43590	AT1G67340
	AT3G62550	AT2G44560	AT1G67360
	AT3G62590	AT2G45130	AT1G67365
	AT3G62610	AT2G45135	AT1G67480
	AT3G62700	AT2G45190	AT1G67560
	AT3G63160	AT2G45190	AT1G67590
	AT3G63440	AT2G45190	AT1G67730
	AT3G66652	AT2G45220	AT1G67855
	AT4G00020	AT2G45240	AT1G67900
	AT4G00165	AT2G45360	AT1G68020
	AT4G00690	AT2G45400	AT1G68130
	AT4G00720	AT2G45430	AT1G68430
	AT4G00895	AT2G45430	AT1G68440
	AT4G01150	AT2G45430	AT1G68510
	AT4G01270	AT2G45430	AT1G68530
	AT4G01310	AT2G46630	AT1G68580
	AT4G01580	AT2G46740	AT1G68640
	AT4G02070	AT2G46760	AT1G68650
	AT4G02150	AT2G46770	AT1G68820
	AT4G02660	AT2G46770	AT1G68830
	AT4G02670	AT2G46770	AT1G68840
	AT4G02750	AT2G46770	AT1G68845
	AT4G03130	AT2G46870	AT1G68870
	AT4G03230	AT2G46900	AT1G69120
	AT4G03280	AT2G47040	AT1G69130
	AT4G05090	AT2G47050	AT1G69110
	AT4G05110	AT2G47540	AT1G69180
	AT4G08210	AT3G01270	AT1G69310
	AT4G09180	AT3G01700	AT1G69520
	AT4G09650	AT3G01960	AT1G69580
	AT4G10910	AT3G02000	AT1G69640
	AT4G11140	AT3G02150	AT1G69770
	AT4G11400	AT3G02150	AT1G70000
	AT4G11690	AT3G02310	AT1G70010
	AT4G12400	AT3G02620	AT1G70190
	AT4G12880	AT3G02670	AT1G70270
	AT4G12970	AT3G03280	AT1G70280
	AT4G13330	AT3G03670	AT1G70290
	AT4G13640	AT3G03760	AT1G70290
	AT4G13670	AT3G04060	AT1G70370
	AT4G13690	AT3G04060	AT1G70420
	AT4G13700	AT3G04220	AT1G70510
	AT4G13750	AT3G04290	AT1G70570
	AT4G13830	AT3G04290	AT1G70660
	AT4G13930	AT3G04360	AT1G70700
	AT4G13950	AT3G04360	AT1G70780
	AT4G13990	AT3G04510	AT1G70782
	AT4G14010	AT3G04510	AT1G70890
	AT4G14040	AT3G04510	AT1G70895
	AT4G14150	AT3G04570	AT1G70900
	AT4G14190	AT3G04570	AT1G71830
	AT4G14240	AT3G04570	AT1G71866
	AT4G14270	AT3G04990	AT1G72080
	AT4G14320	AT3G05450	AT1G72090
	AT4G14360	AT3G06010	AT1G72310
	AT4G14385	AT3G06020	AT1G72410
	AT4G14440	AT3G06120	AT1G72416
	AT4G14590	AT3G06435	AT1G72430
	AT4G14600	AT3G06435	AT1G72450
	AT4G14605	AT3G06435	AT1G72490
	AT4G14615	AT3G06460	AT1G72640
	AT4G14640	AT3G06470	AT1G72650
	AT4G14660	AT3G06470	AT1G72700
	AT4G14695	AT3G06778	AT1G72700
	AT4G14700	AT3G09220	AT1G72710
	AT4G14716	AT3G09220	AT1G72970
	AT4G14730	AT3G09520	AT1G73080
	AT4G14850	AT3G09930	AT1G73120
	AT4G14880	AT3G09930	AT1G73130
	AT4G14950	AT3G09930	AT1G73390
	AT4G15000	AT3G09925	AT1G73400
	AT4G15010	AT3G09940	AT1G73550
	AT4G15090	AT3G10000	AT1G73687
	AT4G15093	AT3G10000	AT1G73690
	AT4G15210	AT3G10000	AT1G73805
	AT4G15260	AT3G10000	AT1G73880
	AT4G15420	AT3G10280	AT1G73885
	AT4G15430	AT3G10280	AT1G74130
	AT4G15440	AT3G10340	AT1G74160
	AT4G15475	AT3G10580	AT1G74300
	AT4G15490	AT3G10580	AT1G74310
	AT4G15620	AT3G10585	AT1G74320
	AT4G15630	AT3G10585	AT1G74330
	AT4G15880	AT3G10585	AT1G74510
	AT4G15910	AT3G10590	AT1G74840
	AT4G15975	AT3G10590	AT1G74850
	AT4G16050	AT3G10590	AT1G74860
	AT4G16060	AT3G10595	AT1G74910
	AT4G16120	AT3G10600	AT1G74960
	AT4G16140	AT3G11150	AT1G75060
	AT4G16190	AT3G11150	AT1G75070
	AT4G16250	AT3G11150	AT1G75370
	AT4G16500	AT3G11150	AT1G75394
	AT4G16520	AT3G11160	AT1G75440
	AT4G16540	AT3G11160	AT1G75480
	AT4G16550	AT3G11160	AT1G75530
	AT4G16560	AT3G11165	AT1G75740
	AT4G16590	AT3G11300	AT1G75810
	AT4G16600	AT3G11300	AT1G75820
	AT4G16610	AT3G11430	AT1G75890
	AT4G16680	AT3G11430	AT1G75960
	AT4G16690	AT3G12410	AT1G76090
	AT4G16700	AT3G12410	AT1G76110
	AT4G16765	AT3G12410	AT1G76170
	AT4G16780	AT3G12410	AT1G76250
	AT4G16790	AT3G12420	AT1G76260
	AT4G16800	AT3G12420	AT1G76420
	AT4G16807	AT3G12420	AT1G76440
	AT4G16820	AT3G12430	AT1G76450
	AT4G16830	AT3G12430	AT1G76660
	AT4G16845	AT3G12430	AT1G76660
	AT4G16892	AT3G12440	AT1G76892
	AT4G16900	AT3G12440	AT1G76900
	AT4G16920	AT3G12440	AT1G76940
	AT4G16950	AT3G12440	AT1G76950
	AT4G16970	AT3G12460	AT1G76952
	AT4G16980	AT3G12460	AT1G76980
	AT4G16990	AT3G12470	AT1G77210
	AT4G17050	AT3G12720	AT1G77220
	AT4G17060	AT3G12720	AT1G77280
	AT4G17486	AT3G12730	AT1G77450
	AT4G17510	AT3G12890	AT1G77765
	AT4G17520	AT3G12900	AT1G78000
	AT4G17530	AT3G12910	AT1G78080
	AT4G17560	AT3G12910	AT1G78100
	AT4G17600	AT3G13280	AT1G78130
	AT4G17610	AT3G13540	AT1G78160
	AT4G17695	AT3G13540	AT1G78265
	AT4G17760	AT3G13530	AT1G78420
	AT4G17800	AT3G13810	AT1G78440
	AT4G17810	AT3G13810	AT1G78480
	AT4G17830	AT3G13890	AT1G78490
	AT4G17920	AT3G13890	AT1G78865
	AT4G17940	AT3G13890	AT1G78870
	AT4G17950	AT3G13960	AT1G79050
	AT4G17960	AT3G14475	AT1G79060
	AT4G18030	AT3G14490	AT1G79050
	AT4G18197	AT3G14490	AT1G79060
	AT4G18220	AT3G15280	AT1G79075
	AT4G18260	AT3G15280	AT1G79190
	AT4G18300	AT3G15280	AT1G79480
	AT4G18375	AT3G15510	AT1G80020
	AT4G18440	AT3G15510	AT1G80100
	AT4G18465	AT3G15534	AT1G80280
	AT4G18480	AT3G15909	AT1G80290
	AT4G18530	AT3G16390	AT1G80530
	AT4G18580	AT3G16440	AT1G80780
	AT4G18590	AT3G16590	AT2G01010
	AT4G18630	AT3G16670	AT2G01020
	AT4G18700	AT3G16920	AT2G01130
	AT4G18890	AT3G16920	AT2G01140
	AT4G18960	AT3G17120	AT2G01190
	AT4G18975	AT3G17185	AT2G01210
	AT4G18980	AT3G17250	AT2G01220
	AT4G19003	AT3G17320	AT2G01250
	AT4G19020	AT3G17320	AT2G01505
	AT4G19030	AT3G17320	AT2G01680
	AT4G19040	AT3G17480	AT2G01710
	AT4G19045	AT3G17530	AT2G01700
	AT4G19080	AT3G17570	AT2G01818
	AT4G19185	AT3G18020	AT2G01850
	AT4G19190	AT3G18010	AT2G02170
	AT4G19220	AT3G18010	AT2G02180
	AT4G19400	AT3G18010	AT2G02220
	AT4G19430	AT3G18282	AT2G02470
	AT4G19490	AT3G18550	AT2G02620
	AT4G19540	AT3G18550	AT2G02620
	AT4G19560	AT3G18560	AT2G02630
	AT4G19630	AT3G18560	AT2G02630
	AT4G19650	AT3G18560	AT2G02640
	AT4G19660	AT3G18715	AT2G02730
	AT4G20090	AT3G19070	AT2G02740
	AT4G20340	AT3G19070	AT2G02795
	AT4G20920	AT3G19200	AT2G03040
	AT4G21460	AT3G19270	AT2G03170
	AT4G21520	AT3G20160	AT2G03280
	AT4G21590	AT3G20470	AT2G03290
	AT4G21640	AT3G20555	AT2G03650
	AT4G21650	AT3G20555	AT2G03710
	AT4G21690	AT3G20555	AT2G04039
	AT4G21730	AT3G20710	AT2G04690
	AT4G21820	AT3G20710	AT2G05330
	AT4G22090	AT3G20760	AT2G05335
	AT4G22540	AT3G20760	AT2G05680
	AT4G22770	AT3G20760	AT2G05812
	AT4G22870	AT3G20840	AT2G05910
	AT4G22950	AT3G20978	AT2G05910
	AT4G22970	AT3G20978	AT2G06000
	AT4G23670	AT3G20980	AT2G06002
	AT4G23680	AT3G20980	AT2G06005
	AT4G24540	AT3G20997	AT2G06000
	AT4G25000	AT3G20997	AT2G06005
	AT4G25160	AT3G20997	AT2G06200
	AT4G25330	AT3G20997	AT2G06850
	AT4G25340	AT3G21060	AT2G07150
	AT4G25420	AT3G21210	AT2G07486
	AT4G25515	AT3G21260	AT2G07490
	AT4G25630	AT3G21270	AT2G10410
	AT4G25700	AT3G21710	AT2G10420
	AT4G25990	AT3G21800	AT2G10921
	AT4G27330	AT3G21850	AT2G10930
	AT4G27510	AT3G21880	AT2G11000
	AT4G27660	AT3G22060	AT2G11005
	AT4G27810	AT3G22710	AT2G11000
	AT4G27980	AT3G22800	AT2G11170
	AT4G28270	AT3G22820	AT2G11270
	AT4G28560	AT3G22840	AT2G11240
	AT4G29170	AT3G22840	AT2G11520
	AT4G29700	AT3G22840	AT2G11910
	AT4G29730	AT3G22840	AT2G11930
	AT4G29760	AT3G22920	AT2G12190
	AT4G29770	AT3G23120	AT2G12400
	AT4G30090	AT3G23230	AT2G12400
	AT4G30130	AT3G23230	AT2G12407
	AT4G30190	AT3G23290	AT2G12462
	AT4G30200	AT3G23637	AT2G13430
	AT4G30270	AT3G24220	AT2G13420
	AT4G30550	AT3G24255	AT2G13460
	AT4G30870	AT3G24540	AT2G13950
	AT4G30930	AT3G24650	AT2G14120
	AT4G30960	AT3G24650	AT2G14130
	AT4G31020	AT3G24650	AT2G14206
	AT4G31248	AT3G24650	AT2G14255
	AT4G31360	AT3G24650	AT2G14255
	AT4G31380	AT3G24770	AT2G14260
	AT4G31400	AT3G24780	AT2G14270
	AT4G31530	AT3G25710	AT2G14290
	AT4G31810	AT3G25710	AT2G14750
	AT4G32280	AT3G25710	AT2G14860
	AT4G32620	AT3G25770	AT2G14878
	AT4G32690	AT3G25770	AT2G15390
	AT4G33770	AT3G26010	AT2G15400
	AT4G34190	AT3G26120	AT2G15790
	AT4G34620	AT3G26790	AT2G15810
	AT4G34860	AT3G26790	AT2G16365
	AT4G35070	AT3G26790	AT2G17370
	AT4G35900	AT3G26790	AT2G17720
	AT4G36120	AT3G27180	AT2G17870
	AT4G36410	AT3G27250	AT2G17950
	AT4G36580	AT3G27250	AT2G18250
	AT4G36620	AT3G27250	AT2G18260
	AT4G37110	AT3G28230	AT2G18560
	AT4G37400	AT3G28250	AT2G18720
	AT4G37490	AT3G28510	AT2G18730
	AT4G37630	AT3G43110	AT2G19180
	AT4G37640	AT3G46090	AT2G19210
	AT4G37670	AT3G46370	AT2G19320
	AT4G37925	AT3G49460	AT2G19330
	AT4G38810	AT3G49770	AT2G19400
	AT4G39790	AT3G49770	AT2G19460
	AT4G39970	AT3G50220	AT2G19580
	AT5G01210	AT3G50740	AT2G19780
	AT5G01520	AT3G50870	AT2G19800
	AT5G01660	AT3G51060	AT2G19810
	AT5G01820	AT3G51680	AT2G19950
	AT5G01840	AT3G52450	AT2G19950
	AT5G02420	AT3G52490	AT2G20130
	AT5G02540	AT3G52490	AT2G20140
	AT5G02820	AT3G54340	AT2G20270
	AT5G03060	AT3G55110	AT2G20562
	AT5G03520	AT3G55130	AT2G20750
	AT5G03545	AT3G55130	AT2G20800
	AT5G03840	AT3G55240	AT2G20810
	AT5G04490	AT3G55370	AT2G20930
	AT5G04610	AT3G55600	AT2G20940
	AT5G04840	AT3G57130	AT2G20950
	AT5G04895	AT3G57130	AT2G21060
	AT5G05130	AT3G58070	AT2G21080
	AT5G05510	AT3G58070	AT2G21120
	AT5G05570	AT3G58080	AT2G21240
	AT5G06070	AT3G59010	AT2G21250
	AT5G06120	AT3G59710	AT2G21260
	AT5G06400	AT3G60490	AT2G21270
	AT5G06810	AT3G60480	AT2G21300
	AT5G07280	AT3G60520	AT2G21310
	AT5G07500	AT3G60520	AT2G21610
	AT5G07660	AT3G60670	AT2G21620
	AT5G07810	AT3G60670	AT2G22310
	AT5G08020	AT3G60870	AT2G22320
	AT5G08170	AT3G60870	AT2G22330
	AT5G08490	AT3G60960	AT2G22530
	AT5G09240	AT3G61150	AT2G22540
	AT5G09700	AT3G61720	AT2G22540
	AT5G09780	AT3G62170	AT2G22720
	AT5G09800	AT3G62170	AT2G22820
	AT5G10010	AT3G62210	AT2G22980
	AT5G10946	AT3G62230	AT2G23000
	AT5G11060	AT3G62230	AT2G23020
	AT5G11070	AT3G62440	AT2G23170
	AT5G12100	AT3G62460	AT2G23171
	AT5G12430	AT3G62610	AT2G23171
	AT5G12910	AT3G62670	AT2G23670
	AT5G13060	AT4G00080	AT2G23673
	AT5G13600	AT4G00080	AT2G23950
	AT5G13680	AT4G00124	AT2G24240
	AT5G13730	AT4G00180	AT2G24360
	AT5G13790	AT4G00180	AT2G24520
	AT5G13820	AT4G00180	AT2G24590
	AT5G13830	AT4G00190	AT2G24592
	AT5G13960	AT4G00210	AT2G24625
	AT5G14000	AT4G00220	AT2G24860
	AT5G14010	AT4G00220	AT2G25090
	AT5G14565	AT4G00220	AT2G25180
	AT5G14580	AT4G00220	AT2G26040
	AT5G14610	AT4G00230	AT2G26040
	AT5G15550	AT4G00250	AT2G26130
	AT5G16660	AT4G00300	AT2G26280
	AT5G16690	AT4G00300	AT2G26520
	AT5G16850	AT4G00310	AT2G26750
	AT5G16860	AT4G00310	AT2G26980
	AT5G16970	AT4G00310	AT2G27020
	AT5G16980	AT4G00310	AT2G27210
	AT5G17020	AT4G00320	AT2G27228
	AT5G17060	AT4G00390	AT2G27229
	AT5G17250	AT4G00390	AT2G27230
	AT5G17810	AT4G00390	AT2G27400
	AT5G18000	AT4G00390	AT2G27402
	AT5G18180	AT4G00400	AT2G27395
	AT5G18560	AT4G00400	AT2G27510
	AT5G18620	AT4G00730	AT2G27520
	AT5G18660	AT4G00730	AT2G27550
	AT5G18720	AT4G00730	AT2G27840
	AT5G19020	AT4G00730	AT2G27990
	AT5G19160	AT4G00730	AT2G28000
	AT5G19320	AT4G00860	AT2G28320
	AT5G19550	AT4G00870	AT2G28550
	AT5G19740	AT4G00870	AT2G29490
	AT5G19890	AT4G00870	AT2G29510
	AT5G20720	AT4G00870	AT2G29970
	AT5G20980	AT4G00955	AT2G30000
	AT5G21140	AT4G00940	AT2G30010
	AT5G21150	AT4G00940	AT2G30520
	AT5G22140	AT4G01350	AT2G30520
	AT5G22290	AT4G01460	AT2G30530
	AT5G22750	AT4G01500	AT2G31160
	AT5G23260	AT4G01500	AT2G31400
	AT5G23730	AT4G01500	AT2G31800
	AT5G23750	AT4G01500	AT2G31810
	AT5G23800	AT4G01520	AT2G31870
	AT5G23880	AT4G01520	AT2G31880
	AT5G23930	AT4G01520	AT2G32020
	AT5G24280	AT4G01520	AT2G32110
	AT5G25460	AT4G01520	AT2G33010
	AT5G25580	AT4G01520	AT2G33509
	AT5G25840	AT4G01720	AT2G33520
	AT5G25880	AT4G01950	AT2G33509
	AT5G27550	AT4G01950	AT2G33520
	AT5G27680	AT4G01985	AT2G33520
	AT5G28750	AT4G01985	AT2G33530
	AT5G28960	AT4G01985	AT2G33540
	AT5G32460	AT4G02180	AT2G33585
	AT5G37790	AT4G02320	AT2G33590
	AT5G39610	AT4G02660	AT2G33860
	AT5G39630	AT4G02660	AT2G33870
	AT5G39770	AT4G02670	AT2G33880
	AT5G40030	AT4G02670	AT2G34315
	AT5G40270	AT4G02670	AT2G34320
	AT5G40300	AT4G02780	AT2G34330
	AT5G40820	AT4G03070	AT2G34340
	AT5G42580	AT4G03070	AT2G34340
	AT5G42630	AT4G03070	AT2G34340
	AT5G42700	AT4G03298	AT2G34420
	AT5G42760	AT4G04450	AT2G34430
	AT5G43290	AT4G04570	AT2G34640
	AT5G43530	AT4G05100	AT2G34650
	AT5G43840	AT4G05470	AT2G34710
	AT5G43870	AT4G05475	AT2G34710
	AT5G44150	AT4G05475	AT2G34710
	AT5G44780	AT4G05475	AT2G34790
	AT5G45276	AT4G05475	AT2G34925
	AT5G45310	AT4G05490	AT2G35060
	AT5G45560	AT4G05490	AT2G35510
	AT5G45680	AT4G05490	AT2G35520
	AT5G46915	AT4G08150	AT2G35605
	AT5G46920	AT4G08351	AT2G35612
	AT5G47150	AT4G08740	AT2G35613
	AT5G47460	AT4G08740	AT2G35637
	AT5G47550	AT4G08740	AT2G35650
	AT5G47590	AT4G09780	AT2G35637
	AT5G47600	AT4G09960	AT2G35650
	AT5G47680	AT4G10345	AT2G35800
	AT5G47790	AT4G10670	AT2G35860
	AT5G48170	AT4G10740	AT2G36050
	AT5G48520	AT4G11210	AT2G36053
	AT5G49110	AT4G11210	AT2G36080
	AT5G49152	AT4G11210	AT2G36090
	AT5G49460	AT4G11210	AT2G36400
	AT5G50800	AT4G11750	AT2G36402
	AT5G51120	AT4G12050	AT2G36590
	AT5G51270	AT4G12050	AT2G36695
	AT5G51545	AT4G12050	AT2G36830
	AT5G51670	AT4G12050	AT2G36835
	AT5G51800	AT4G12380	AT2G37090
	AT5G51870	AT4G12480	AT2G37100
	AT5G51970	AT4G13260	AT2G37200
	AT5G52440	AT4G13260	AT2G37240
	AT5G52630	AT4G13260	AT2G37250
	AT5G53048	AT4G13260	AT2G37390
	AT5G53280	AT4G13260	AT2G37590
	AT5G53560	AT4G13260	AT2G37630
	AT5G53660	AT4G13460	AT2G37640
	AT5G53950	AT4G13495	AT2G37650
	AT5G54145	AT4G13600	AT2G37940
	AT5G54770	AT4G13960	AT2G37950
	AT5G54940	AT4G13985	AT2G38020
	AT5G55090	AT4G13985	AT2G38030
	AT5G55220	AT4G13985	AT2G38060
	AT5G56260	AT4G14465	AT2G38060
	AT5G56580	AT4G14465	AT2G38070
	AT5G56780	AT4G14560	AT2G38325
	AT5G56795	AT4G14730	AT2G38530
	AT5G56880	AT4G14730	AT2G38544
	AT5G57345	AT4G15120	AT2G38810
	AT5G57450	AT4G15160	AT2G38820
	AT5G57570	AT4G15160	AT2G39175
	AT5G57720	AT4G15160	AT2G39250
	AT5G57785	AT4G15160	AT2G39435
	AT5G58050	AT4G15280	AT2G39480
	AT5G58280	AT4G15280	AT2G39560
	AT5G59200	AT4G15390	AT2G39570
	AT5G59390	AT4G15975	AT2G39675
	AT5G60040	AT4G16540	AT2G39780
	AT5G60142	AT4G16550	AT2G39860
	AT5G60630	AT4G16550	AT2G39870
	AT5G60890	AT4G16550	AT2G40140
	AT5G61070	AT4G16550	AT2G40210
	AT5G61090	AT4G16550	AT2G40230
	AT5G61100	AT4G16560	AT2G40233
	AT5G61120	AT4G16560	AT2G40475
	AT5G62170	AT4G16990	AT2G40480
	AT5G62230	AT4G17695	AT2G40550
	AT5G62440	AT4G17695	AT2G40750
	AT5G63160	AT4G17695	AT2G40810
	AT5G63300	AT4G17800	AT2G41070
	AT5G63350	AT4G17800	AT2G41140
	AT5G63570	AT4G17800	AT2G41160
	AT5G63700	AT4G17800	AT2G41230
	AT5G63720	AT4G17800	AT2G41230
	AT5G64230	AT4G17800	AT2G41233
	AT5G64320	AT4G17810	AT2G41233
	AT5G64600	AT4G17810	AT2G41290
	AT5G64710	AT4G17810	AT2G41370
	AT5G64910	AT4G17830	AT2G41550
	AT5G65207	AT4G18170	AT2G41630
	AT5G65230	AT4G18170	AT2G41745
	AT5G66040	AT4G18170	AT2G41770
	AT5G66350	AT4G18170	AT2G41780
	AT5G66631	AT4G18170	AT2G41820
	AT5G66710	AT4G18180	AT2G41900
	AT5G66740	AT4G18350	AT2G42030
	AT5G66750	AT4G18350	AT2G42040
	AT5G67060	AT4G18350	AT2G42200
	AT5G67180	AT4G18390	AT2G42290
	AT5G67620	AT4G18390	AT2G42300
		AT4G18390	AT2G42365
		AT4G18610	AT2G42425
		AT4G18720	AT2G42500
		AT4G18960	AT2G42510
		AT4G18960	AT2G42730
		AT4G19520	AT2G42740
		AT4G19800	AT2G42750
		AT4G19810	AT2G42790
		AT4G19940	AT2G42800
		AT4G20000	AT2G42820
		AT4G21010	AT2G42830
		AT4G21020	AT2G42870
		AT4G21440	AT2G42880
		AT4G21750	AT2G42970
		AT4G21970	AT2G43010
		AT4G22070	AT2G43120
		AT4G22070	AT2G43630
		AT4G22160	AT2G43680
		AT4G22390	AT2G43700
		AT4G22666	AT2G43750
		AT4G22810	AT2G43795
		AT4G22810	AT2G44470
		AT4G23550	AT2G44500
		AT4G23680	AT2G44610
		AT4G23882	AT2G44620
		AT4G24050	AT2G44660
		AT4G24050	AT2G44670
		AT4G24050	AT2G44730
		AT4G24060	AT2G44798
		AT4G24060	AT2G44840
		AT4G24060	AT2G44900
		AT4G24070	AT2G45120
		AT4G24540	AT2G45140
		AT4G24540	AT2G45290
		AT4G25410	AT2G45410
		AT4G25410	AT2G45412
		AT4G25386	AT2G45430
		AT4G25434	AT2G45460
		AT4G25434	AT2G45580
		AT4G25780	AT2G45590
		AT4G25820	AT2G45640
		AT4G26280	AT2G45650
		AT4G26420	AT2G45660
		AT4G26820	AT2G45660
		AT4G26880	AT2G45660
		AT4G27140	AT2G45680
		AT4G27140	AT2G45820
		AT4G27140	AT2G45830
		AT4G27140	AT2G45900
		AT4G27140	AT2G45950
		AT4G27170	AT2G45960
		AT4G27330	AT2G46000
		AT4G27330	AT2G46020
		AT4G27420	AT2G46320
		AT4G28520	AT2G46330
		AT4G28520	AT2G46410
		AT4G28530	AT2G46420
		AT4G28530	AT2G46455
		AT4G28530	AT2G46460
		AT4G28840	AT2G46530
		AT4G28840	AT2G46580
		AT4G28840	AT2G46590
		AT4G28840	AT2G46970
		AT4G28840	AT2G46980
		AT4G28850	AT2G46990
		AT4G28850	AT2G47200
		AT4G29100	AT2G47210
		AT4G29110	AT2G47260
		AT4G29120	AT2G47280
		AT4G29150	AT2G47480
		AT4G29230	AT2G47485
		AT4G29230	AT2G47810
		AT4G29230	AT3G01120
		AT4G29570	AT3G01360
		AT4G29580	AT3G01370
		AT4G29600	AT3G02000
		AT4G29610	AT3G02000
		AT4G29610	AT3G02010
		AT4G29620	AT3G02120
		AT4G29630	AT3G02120
		AT4G29970	AT3G02120
		AT4G30140	AT3G02125
		AT4G30230	AT3G02250
		AT4G30410	AT3G02310
		AT4G30410	AT3G02315
		AT4G30410	AT3G02468
		AT4G30460	AT3G02470
		AT4G31330	AT3G02810
		AT4G31877	AT3G02820
		AT4G31910	AT3G02880
		AT4G31910	AT3G02910
		AT4G32230	AT3G03170
		AT4G32380	AT3G03270
		AT4G32490	AT3G03280
		AT4G32551	AT3G03456
		AT4G32810	AT3G03690
		AT4G32810	AT3G04000
		AT4G33220	AT3G04060
		AT4G33420	AT3G04240
		AT4G33420	AT3G04250
		AT4G33710	AT3G04290
		AT4G33810	AT3G04510
		AT4G34760	AT3G04580
		AT4G35120	AT3G04800
		AT4G35160	AT3G04810
		AT4G35160	AT3G04940
		AT4G35160	AT3G04960
		AT4G35170	AT3G05180
		AT4G35180	AT3G05190
		AT4G35390	AT3G05230
		AT4G35390	AT3G05500
		AT4G35390	AT3G05510
		AT4G35700	AT3G05600
		AT4G35720	AT3G05640
		AT4G35720	AT3G05690
		AT4G36160	AT3G05700
		AT4G36220	AT3G05710
		AT4G36268	AT3G05770
		AT4G36260	AT3G05935
		AT4G36260	AT3G05970
		AT4G36260	AT3G06220
		AT4G36260	AT3G06230
		AT4G36260	AT3G06750
		AT4G36268	AT3G06790
		AT4G36610	AT3G06930
		AT4G36620	AT3G07390
		AT4G36620	AT3G07560
		AT4G36620	AT3G07565
		AT4G36870	AT3G07650
		AT4G36870	AT3G07700
		AT4G37390	AT3G07720
		AT4G37650	AT3G08530
		AT4G37650	AT3G08550
		AT4G37720	AT3G08590
		AT4G37750	AT3G08600
		AT4G37770	AT3G08850
		AT4G37770	AT3G09000
		AT4G37770	AT3G09020
		AT4G37780	AT3G09370
		AT4G37850	AT3G09560
		AT4G37860	AT3G09570
		AT4G38000	AT3G09580
		AT4G38220	AT3G09600
		AT4G39000	AT3G09650
		AT4G39410	AT3G09710
		AT4G39410	AT3G10010
		AT4G39590	AT3G10015
		AT4G39590	AT3G10040
		AT4G39590	AT3G10150
		AT4G39590	AT3G10480
		AT4G39610	AT3G10740
		AT4G39745	AT3G10745
		AT4G39745	AT3G10750
		AT4G39745	AT3G10990
		AT4G39745	AT3G11000
		AT4G39750	AT3G11150
		AT4G39750	AT3G11700
		AT4G39753	AT3G11700
		AT4G39753	AT3G11850
		AT4G39756	AT3G11850
		AT4G39950	AT3G11860
		AT4G39950	AT3G12120
		AT5G01190	AT3G12190
		AT5G01310	AT3G12450
		AT5G01310	AT3G12560
		AT5G01310	AT3G12620
		AT5G01310	AT3G12630
		AT5G01310	AT3G12920
		AT5G01380	AT3G12980
		AT5G01900	AT3G13000
		AT5G01900	AT3G13060
		AT5G01900	AT3G13080
		AT5G01900	AT3G13110
		AT5G02000	AT3G13180
		AT5G02025	AT3G13190
		AT5G02030	AT3G13200
		AT5G02030	AT3G13405
		AT5G02030	AT3G13510
		AT5G02030	AT3G13510
		AT5G02030	AT3G13670
		AT5G02460	AT3G13710
		AT5G02460	AT3G13898
		AT5G02460	AT3G13960
		AT5G02460	AT3G13960
		AT5G02460	AT3G13960
		AT5G02920	AT3G14185
		AT5G02980	AT3G14190
		AT5G02990	AT3G14220
		AT5G02990	AT3G14220
		AT5G02990	AT3G14230
		AT5G02990	AT3G14350
		AT5G02990	AT3G14362
		AT5G02990	AT3G14380
		AT5G02990	AT3G14450
		AT5G02990	AT3G14490
		AT5G03000	AT3G14980
		AT5G03000	AT3G14990
		AT5G03000	AT3G15010
		AT5G03000	AT3G15170
		AT5G03150	AT3G15170
		AT5G03150	AT3G15180
		AT5G03150	AT3G15210
		AT5G03150	AT3G15290
		AT5G03150	AT3G15470
		AT5G03680	AT3G15518
		AT5G03680	AT3G15520
		AT5G03680	AT3G15548
		AT5G03680	AT3G15610
		AT5G03680	AT3G15630
		AT5G03680	AT3G15640
		AT5G03790	AT3G15710
		AT5G03790	AT3G15750
		AT5G03810	AT3G15840
		AT5G03810	AT3G15850
		AT5G03810	AT3G16370
		AT5G03820	AT3G16380
		AT5G04310	AT3G16390
		AT5G04347	AT3G16500
		AT5G04690	AT3G16620
		AT5G05060	AT3G16820
		AT5G05160	AT3G16830
		AT5G05150	AT3G16910
		AT5G05150	AT3G17010
		AT5G05340	AT3G17330
		AT5G05790	AT3G17390
		AT5G05965	AT3G17400
		AT5G06250	AT3G17420
		AT5G06330	AT3G17600
		AT5G06380	AT3G17850
		AT5G06380	AT3G17940
		AT5G06380	AT3G17950
		AT5G06380	AT3G17998
		AT5G06390	AT3G18000
		AT5G06650	AT3G18020
		AT5G06710	AT3G18050
		AT5G06839	AT3G18080
		AT5G07000	AT3G18230
		AT5G07080	AT3G18600
		AT5G07080	AT3G18780
		AT5G07080	AT3G18895
		AT5G07190	AT3G18900
		AT5G07210	AT3G18930
		AT5G07310	AT3G19100
		AT5G07480	AT3G19140
		AT5G07480	AT3G19150
		AT5G07480	AT3G19170
		AT5G07530	AT3G19180
		AT5G07530	AT3G19280
		AT5G07600	AT3G19290
		AT5G07930	AT3G19450
		AT5G07930	AT3G19540
		AT5G08130	AT3G20120
		AT5G08150	AT3G20260
		AT5G08150	AT3G20270
		AT5G08150	AT3G20340
		AT5G08150	AT3G20350
		AT5G08460	AT3G21090
		AT5G09470	AT3G21100
		AT5G09470	AT3G22120
		AT5G09750	AT3G22133
		AT5G09750	AT3G22142
		AT5G09760	AT3G22170
		AT5G09970	AT3G22180
		AT5G09970	AT3G22190
		AT5G09970	AT3G22200
		AT5G10140	AT3G22270
		AT5G10140	AT3G22380
		AT5G10140	AT3G22400
		AT5G10140	AT3G22810
		AT5G10270	AT3G22886
		AT5G10278	AT3G22930
		AT5G10280	AT3G23030
		AT5G10504	AT3G23130
		AT5G10510	AT3G23290
		AT5G10510	AT3G23290
		AT5G11320	AT3G23380
		AT5G11530	AT3G23650
		AT5G11530	AT3G23820
		AT5G11530	AT3G24010
		AT5G11530	AT3G24020
		AT5G11530	AT3G24150
		AT5G11530	AT3G24160
		AT5G11530	AT3G24440
		AT5G11540	AT3G25640
		AT5G11540	AT3G25905
		AT5G11540	AT3G25910
		AT5G11930	AT3G26120
		AT5G11940	AT3G26180
		AT5G12323	AT3G26265
		AT5G12330	AT3G26690
		AT5G12330	AT3G26710
		AT5G12330	AT3G26780
		AT5G12330	AT3G26813
		AT5G12330	AT3G27010
		AT5G12350	AT3G27325
		AT5G12340	AT3G27321
		AT5G12870	AT3G27460
		AT5G13130	AT3G27470
		AT5G13130	AT3G27740
		AT5G13130	AT3G27750
		AT5G13170	AT3G27770
		AT5G13250	AT3G27920
		AT5G13250	AT3G27930
		AT5G13250	AT3G27940
		AT5G13250	AT3G28850
		AT5G14010	AT3G29020
		AT5G14010	AT3G29034
		AT5G14011	AT3G29035
		AT5G14690	AT3G29077
		AT5G14690	AT3G29076
		AT5G14860	AT3G29152
		AT5G14860	AT3G29570
		AT5G14920	AT3G30170
		AT5G14920	AT3G30210
		AT5G14920	AT3G30790
		AT5G14940	AT3G31980
		AT5G14940	AT3G32240
		AT5G15130	AT3G32250
		AT5G15150	AT3G42110
		AT5G15150	AT3G42170
		AT5G15150	AT3G42670
		AT5G15150	AT3G42766
		AT5G15160	AT3G43600
		AT5G15660	AT3G43830
		AT5G15660	AT3G44326
		AT5G15660	AT3G44370
		AT5G15660	AT3G44780
		AT5G15800	AT3G44950
		AT5G15800	AT3G44970
		AT5G15830	AT3G45690
		AT5G16460	AT3G46600
		AT5G16560	AT3G46780
		AT5G16560	AT3G47050
		AT5G16700	AT3G47060
		AT5G16700	AT3G47610
		AT5G16700	AT3G47630
		AT5G17070	AT3G47720
		AT5G17073	AT3G47800
		AT5G17073	AT3G48050
		AT5G17090	AT3G48060
		AT5G17090	AT3G48070
		AT5G17090	AT3G48090
		AT5G17100	AT3G48131
		AT5G17100	AT3G48130
		AT5G17100	AT3G48240
		AT5G17100	AT3G48237
		AT5G17110	AT3G48240
		AT5G17110	AT3G48237
		AT5G17110	AT3G48530
		AT5G17110	AT3G48690
		AT5G17490	AT3G49050
		AT5G17750	AT3G49550
		AT5G17800	AT3G49790
		AT5G17795	AT3G49796
		AT5G17820	AT3G49790
		AT5G18560	AT3G49796
		AT5G18560	AT3G50060
		AT5G18560	AT3G50060
		AT5G18930	AT3G50330
		AT5G19040	AT3G50380
		AT5G19040	AT3G50390
		AT5G19040	AT3G50410
		AT5G19110	AT3G50450
		AT5G19270	AT3G50650
		AT5G19700	AT3G50790
		AT5G19880	AT3G50825
		AT5G19890	AT3G50830
		AT5G20230	AT3G50835
		AT5G20240	AT3G51057
		AT5G20740	AT3G51060
		AT5G20740	AT3G51290
		AT5G20740	AT3G51550
		AT5G20740	AT3G51670
		AT5G20740	AT3G51720
		AT5G21150	AT3G51750
		AT5G21950	AT3G51840
		AT5G21950	AT3G51850
		AT5G21950	AT3G51860
		AT5G21960	AT3G51895
		AT5G21960	AT3G51920
		AT5G21960	AT3G51930
		AT5G22160	AT3G52105
		AT5G22260	AT3G52380
		AT5G22260	AT3G52480
		AT5G22260	AT3G52880
		AT5G22260	AT3G52920
		AT5G22390	AT3G52957
		AT5G22490	AT3G53020
		AT5G22791	AT3G53610
		AT5G22870	AT3G53620
		AT5G23000	AT3G54210
		AT5G23170	AT3G54220
		AT5G23220	AT3G54340
		AT5G23230	AT3G54470
		AT5G23260	AT3G54990
		AT5G23260	AT3G55000
		AT5G23260	AT3G55512
		AT5G23950	AT3G55512
		AT5G23950	AT3G55560
		AT5G23950	AT3G55890
		AT5G24130	AT3G56060
		AT5G24220	AT3G56100
		AT5G24220	AT3G56370
		AT5G24220	AT3G56380
		AT5G24540	AT3G56660
		AT5G24550	AT3G56800
		AT5G24550	AT3G56890
		AT5G24580	AT3G56900
		AT5G24580	AT3G57030
		AT5G24580	AT3G57080
		AT5G24860	AT3G57230
		AT5G24910	AT3G57370
		AT5G25110	AT3G57380
		AT5G25110	AT3G57390
		AT5G25160	AT3G57400
		AT5G25290	AT3G57550
		AT5G25290	AT3G57800
		AT5G25330	AT3G57800
		AT5G25340	AT3G57810
		AT5G25550	AT3G57870
		AT5G25620	AT3G57880
		AT5G25930	AT3G57920
		AT5G25980	AT3G57920
		AT5G25990	AT3G58193
		AT5G26310	AT3G58560
		AT5G26310	AT3G58570
		AT5G26340	AT3G58770
		AT5G27050	AT3G58780
		AT5G28300	AT3G59060
		AT5G28490	AT3G59068
		AT5G35770	AT3G59090
		AT5G35770	AT3G59110
		AT5G35770	AT3G59530
		AT5G37060	AT3G59970
		AT5G37990	AT3G60070
		AT5G39010	AT3G60080
		AT5G40790	AT3G60110
		AT5G40790	AT3G60130
		AT5G40800	AT3G60210
		AT5G43360	AT3G60380
		AT5G44160	AT3G60390
		AT5G46660	AT3G60390
		AT5G46830	AT3G60400
		AT5G46880	AT3G60420
		AT5G47560	AT3G60580
		AT5G47600	AT3G60670
		AT5G49138	AT3G60740
		AT5G49130	AT3G60750
		AT5G49250	AT3G60870
		AT5G49520	AT3G60980
		AT5G49520	AT3G61080
		AT5G49520	AT3G61150
		AT5G49520	AT3G61160
		AT5G49520	AT3G61250
		AT5G50300	AT3G61760
		AT5G50480	AT3G61763
		AT5G50950	AT3G61770
		AT5G51790	AT3G61897
		AT5G51800	AT3G61947
		AT5G52620	AT3G61950
		AT5G53940	AT3G62070
		AT5G53940	AT3G62080
		AT5G54700	AT3G62090
		AT5G55250	AT3G62270
		AT5G55800	AT3G62529
		AT5G55800	AT3G62600
		AT5G55893	AT3G62620
		AT5G56240	AT3G62860
		AT5G56920	AT3G63010
		AT5G57130	AT3G63060
		AT5G57625	AT3G63070
		AT5G57780	AT3G63060
		AT5G57780	AT3G63070
		AT5G58890	AT3G63220
		AT5G59520	AT3G63300
		AT5G60010	AT3G63340
		AT5G60910	AT3G63350
		AT5G60970	AT3G63410
		AT5G61120	AT3G63420
		AT5G62340	AT3G63440
		AT5G62340	AT3G63530
		AT5G62510	AT4G00310
		AT5G63180	AT4G00450
		AT5G63450	AT4G00530
		AT5G64120	AT4G00750
		AT5G64120	AT4G00890
		AT5G64120	AT4G00900
		AT5G65170	AT4G00905
		AT5G66300	AT4G00910
		AT5G66350	AT4G00920
		AT5G66350	AT4G00985
		AT5G66400	AT4G00990
		AT5G66700	AT4G01000
		AT5G66870	AT4G01060
		AT5G67410	AT4G01060
			AT4G01080
			AT4G01120
			AT4G01130
			AT4G01170
			AT4G01250
			AT4G01250
			AT4G01440
			AT4G01460
			AT4G01490
			AT4G01703
			AT4G01710
			AT4G02100
			AT4G02180
			AT4G02480
			AT4G02480
			AT4G02670
			AT4G02670
			AT4G02700
			AT4G03110
			AT4G03170
			AT4G03210
			AT4G03400
			AT4G03410
			AT4G03550
			AT4G04630
			AT4G04890
			AT4G05594
			AT4G08022
			AT4G08240
			AT4G09160
			AT4G09790
			AT4G10080
			AT4G10080
			AT4G10090
			AT4G10390
			AT4G10630
			AT4G10640
			AT4G10800
			AT4G11680
			AT4G11690
			AT4G11820
			AT4G12300
			AT4G12420
			AT4G12423
			AT4G12430
			AT4G12432
			AT4G12910
			AT4G13395
			AT4G13540
			AT4G14210
			AT4G14220
			AT4G14358
			AT4G14360
			AT4G14470
			AT4G14490
			AT4G14500
			AT4G14504
			AT4G14590
			AT4G14600
			AT4G14695
			AT4G14720
			AT4G14723
			AT4G14740
			AT4G14820
			AT4G14830
			AT4G14900
			AT4G15010
			AT4G15020
			AT4G15080
			AT4G15090
			AT4G15250
			AT4G15260
			AT4G15310
			AT4G16141
			AT4G16280
			AT4G16370
			AT4G16390
			AT4G16440
			AT4G16540
			AT4G16610
			AT4G16748
			AT4G16780
			AT4G17270
			AT4G17330
			AT4G17340
			AT4G17350
			AT4G17360
			AT4G17370
			AT4G17710
			AT4G17810
			AT4G17880
			AT4G17890
			AT4G17915
			AT4G17975
			AT4G18380
			AT4G18820
			AT4G18890
			AT4G18960
			AT4G18960
			AT4G18960
			AT4G19120
			AT4G19150
			AT4G19239
			AT4G19420
			AT4G19520
			AT4G19520
			AT4G19520
			AT4G20250
			AT4G20260
			AT4G20430
			AT4G20880
			AT4G20890
			AT4G20930
			AT4G20940
			AT4G21340
			AT4G21362
			AT4G21560
			AT4G21590
			AT4G21690
			AT4G21750
			AT4G21870
			AT4G21880
			AT4G22070
			AT4G22140
			AT4G22790
			AT4G22840
			AT4G22860
			AT4G22860
			AT4G22920
			AT4G22930
			AT4G22950
			AT4G22960
			AT4G22970
			AT4G23010
			AT4G23060
			AT4G23530
			AT4G23620
			AT4G23720
			AT4G23720
			AT4G23750
			AT4G23760
			AT4G24030
			AT4G24040
			AT4G24190
			AT4G24480
			AT4G24660
			AT4G24972
			AT4G24972
			AT4G24973
			AT4G25450
			AT4G25450
			AT4G25470
			AT4G25470
			AT4G25490
			AT4G25500
			AT4G25640
			AT4G25640
			AT4G25690
			AT4G25690
			AT4G25720
			AT4G25840
			AT4G25870
			AT4G25880
			AT4G25950
			AT4G25960
			AT4G25990
			AT4G26488
			AT4G26510
			AT4G27330
			AT4G27410
			AT4G27415
			AT4G27500
			AT4G27500
			AT4G27690
			AT4G27800
			AT4G27820
			AT4G27830
			AT4G27970
			AT4G27980
			AT4G28080
			AT4G28085
			AT4G28110
			AT4G28130
			AT4G28181
			AT4G28190
			AT4G28260
			AT4G28330
			AT4G28450
			AT4G28460
			AT4G28560
			AT4G28564
			AT4G28570
			AT4G28703
			AT4G28880
			AT4G29030
			AT4G29080
			AT4G29080
			AT4G29080
			AT4G29150
			AT4G29220
			AT4G29330
			AT4G29680
			AT4G29840
			AT4G30020
			AT4G30020
			AT4G30072
			AT4G30200
			AT4G30250
			AT4G30340
			AT4G30350
			AT4G30400
			AT4G30490
			AT4G30500
			AT4G30520
			AT4G30800
			AT4G30935
			AT4G30940
			AT4G30990
			AT4G31020
			AT4G31340
			AT4G31390
			AT4G31510
			AT4G31550
			AT4G31600
			AT4G31610
			AT4G31615
			AT4G31800
			AT4G31830
			AT4G31850
			AT4G31875
			AT4G31877
			AT4G31960
			AT4G32290
			AT4G32295
			AT4G32300
			AT4G32400
			AT4G32800
			AT4G32980
			AT4G32990
			AT4G33070
			AT4G33240
			AT4G33440
			AT4G33430
			AT4G33440
			AT4G33625
			AT4G33630
			AT4G33950
			AT4G33990
			AT4G34000
			AT4G34000
			AT4G34160
			AT4G34170
			AT4G34370
			AT4G34380
			AT4G34610
			AT4G34720
			AT4G34780
			AT4G34790
			AT4G34780
			AT4G34790
			AT4G34800
			AT4G34900
			AT4G34910
			AT4G35080
			AT4G35080
			AT4G35220
			AT4G35230
			AT4G35230
			AT4G35550
			AT4G35600
			AT4G35750
			AT4G35780
			AT4G35783
			AT4G35837
			AT4G35840
			AT4G35900
			AT4G36250
			AT4G36840
			AT4G36870
			AT4G36920
			AT4G36970
			AT4G37440
			AT4G37580
			AT4G37570
			AT4G37630
			AT4G37740
			AT4G37810
			AT4G37890
			AT4G38400
			AT4G38401
			AT4G38410
			AT4G38640
			AT4G38660
			AT4G38680
			AT4G38940
			AT4G39070
			AT4G39470
			AT4G39480
			AT4G39675
			AT4G39790
			AT4G39795
			AT4G39800
			AT4G39930
			AT4G39940
			AT4G39950
			AT4G40000
			AT4G40020
			AT4G40030
			AT5G01040
			AT5G01100
			AT5G01170
			AT5G01200
			AT5G01270
			AT5G01365
			AT5G01370
			AT5G01520
			AT5G01595
			AT5G01610
			AT5G01710
			AT5G01712
			AT5G01715
			AT5G01840
			AT5G01860
			AT5G02190
			AT5G02530
			AT5G02530
			AT5G02540
			AT5G02910
			AT5G02980
			AT5G03285
			AT5G03530
			AT5G03540
			AT5G03555
			AT5G03620
			AT5G03670
			AT5G03690
			AT5G03700
			AT5G04050
			AT5G04250
			AT5G04350
			AT5G04480
			AT5G04490
			AT5G04860
			AT5G04940
			AT5G05080
			AT5G05090
			AT5G05940
			AT5G05980
			AT5G05985
			AT5G06043
			AT5G06060
			AT5G06060
			AT5G06090
			AT5G06130
			AT5G06250
			AT5G06250
			AT5G06250
			AT5G06865
			AT5G06870
			AT5G06890
			AT5G06970
			AT5G06980
			AT5G07180
			AT5G07180
			AT5G07250
			AT5G07260
			AT5G07280
			AT5G07290
			AT5G07310
			AT5G07380
			AT5G07490
			AT5G07620
			AT5G07630
			AT5G07820
			AT5G07830
			AT5G07940
			AT5G07980
			AT5G07990
			AT5G08075
			AT5G08080
			AT5G08150
			AT5G08520
			AT5G08520
			AT5G08650
			AT5G08660
			AT5G08670
			AT5G08680
			AT5G08710
			AT5G08717
			AT5G08717
			AT5G08770
			AT5G08780
			AT5G09300
			AT5G09440
			AT5G09440
			AT5G09445
			AT5G09600
			AT5G09620
			AT5G09800
			AT5G09805
			AT5G09805
			AT5G09990
			AT5G10140
			AT5G10150
			AT5G10160
			AT5G10290
			AT5G10300
			AT5G10310
			AT5G10550
			AT5G10740
			AT5G10745
			AT5G10946
			AT5G11060
			AT5G11140
			AT5G11140
			AT5G11160
			AT5G11320
			AT5G11325
			AT5G11700
			AT5G11710
			AT5G11790
			AT5G11900
			AT5G11940
			AT5G11970
			AT5G11970
			AT5G11977
			AT5G12050
			AT5G12060
			AT5G12080
			AT5G12340
			AT5G12350
			AT5G12450
			AT5G12890
			AT5G12930
			AT5G13090
			AT5G13100
			AT5G13220
			AT5G13230
			AT5G13290
			AT5G13400
			AT5G13700
			AT5G13750
			AT5G13760
			AT5G13770
			AT5G13790
			AT5G13790
			AT5G14010
			AT5G14011
			AT5G14180
			AT5G14200
			AT5G14370
			AT5G14420
			AT5G14430
			AT5G14480
			AT5G14490
			AT5G14495
			AT5G14640
			AT5G14710
			AT5G14770
			AT5G15050
			AT5G15070
			AT5G15150
			AT5G15340
			AT5G15340
			AT5G15350
			AT5G15600
			AT5G15950
			AT5G16010
			AT5G16180
			AT5G16235
			AT5G16240
			AT5G16560
			AT5G16770
			AT5G17070
			AT5G17073
			AT5G17230
			AT5G17233
			AT5G17310
			AT5G17760
			AT5G17760
			AT5G17760
			AT5G17770
			AT5G17840
			AT5G17850
			AT5G17970
			AT5G17980
			AT5G17990
			AT5G18000
			AT5G18065
			AT5G18260
			AT5G18310
			AT5G18650
			AT5G18670
			AT5G19095
			AT5G19100
			AT5G19097
			AT5G19140
			AT5G19260
			AT5G19440
			AT5G19510
			AT5G19520
			AT5G20110
			AT5G20120
			AT5G20130
			AT5G20160
			AT5G20170
			AT5G20190
			AT5G20240
			AT5G20240
			AT5G20520
			AT5G20540
			AT5G20635
			AT5G20840
			AT5G21950
			AT5G21280
			AT5G22140
			AT5G22150
			AT5G22310
			AT5G22315
			AT5G22430
			AT5G22740
			AT5G23000
			AT5G23220
			AT5G23260
			AT5G23700
			AT5G23730
			AT5G23800
			AT5G23800
			AT5G23850
			AT5G24000
			AT5G24010
			AT5G24140
			AT5G24180
			AT5G24830
			AT5G24870
			AT5G24890
			AT5G24970
			AT5G24990
			AT5G25160
			AT5G25350
			AT5G25400
			AT5G25580
			AT5G26731
			AT5G26790
			AT5G26800
			AT5G26910
			AT5G26912
			AT5G26940
			AT5G27030
			AT5G27037
			AT5G27035
			AT5G27320
			AT5G27680
			AT5G28150
			AT5G28490
			AT5G28640
			AT5G28770
			AT5G35370
			AT5G35375
			AT5G37680
			AT5G38530
			AT5G39040
			AT5G39260
			AT5G39635
			AT5G40275
			AT5G40280
			AT5G40540
			AT5G40600
			AT5G40800
			AT5G40810
			AT5G40847
			AT5G40850
			AT5G41110
			AT5G41140
			AT5G41315
			AT5G41350
			AT5G41360
			AT5G41380
			AT5G41390
			AT5G41380
			AT5G41390
			AT5G42210
			AT5G42490
[truncated: 225 more rows]
